# Supplementary material
Source: Springer Nature journal article supplement (https://www.springermedizin.de/resource/supplementary/12933_2010_309_MOESM2_ESM.pdf/9540074)

**A**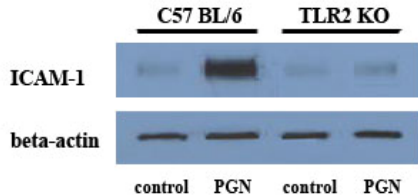**B**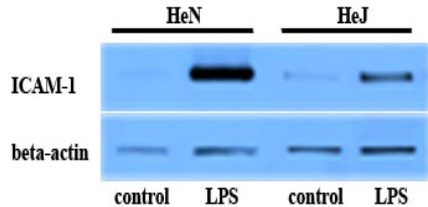

Supplement: MOESM2 [file 9540074]
